# Supplementary material for: Depolymerisation of Kraft Lignin by Tailor-Made Alkaliphilic Fungal Laccases
Source: MDPI journal article supplement (doi:10.3390/polym15224433), 2023-11-16
Supplement: s1 [file s1]

# Supplementary data

## Depolymerisation of kraft lignin by tailor-made alkaliphilic fungal laccases

David Rodríguez-Escribano, Felipe de Salas, Rocío Pliego, Gisela Marques, Thomas Levée, Anu Suonpää, Ana Gutiérrez, Ángel T. Martínez, Petri Ihalainen, Jorge Rencoret\* and Susana Camarero\*.

**Table S1.** Mass balance of lignin fractions generated after 24 h-reaction of eucalyptus kraft lignin (25 g/L) with the alkaliphilic fungal laccase (C-LeB) or without (control) at pH 10, followed by sample drying and resuspension in HCl. Percentages are relative to the initial lignin amount.

| Lignin                  | Control (mg) | Laccase (mg) |
|-------------------------|--------------|--------------|
| Aqueous phase (A) pH 10 |              |              |
| Acid insoluble fraction | 480 (20%)    | 735 (28%)    |
| Acid soluble fraction   | 619 (27%)    | 218 (8%)     |
| Total                   | 1099 (47%)   | 953 (36%)    |
| Solid phase (S) pH 10   |              |              |
| Acid insoluble fraction | 1100 (47%)   | 1690 (63.5%) |
| Acid soluble fraction   | 139 (6%)     | 13 (0.5%)    |
| Total                   | 1239 (53%)   | 1703 (64%)   |
| Total (A+S)             | 2338 (100%)  | 2656 (100%)  |

\*The total lignin (mg) is calculated by the sum of weights of the precipitated lignins and the amounts of soluble lignins estimated from the Abs at 205 nm.

**Table S2.** Average Mw (Da) and polydispersity (PDI) values determined by GPC, and content (mmol/g) in phenolic (PhOH), carboxylic (COOH) and aliphatic (AliphOH) hydroxyl groups determined by <sup>31</sup>P-NMR, of permeate and retentate fractions obtained from the treatment of Eucalyptus kraft lignin with the alkaliphilic fungal laccase (5 U Li10 /g of lignin) in the bioreactor coupled to a membrane separation system.

|       | 2,6-DMP | Vanillin | Acetovanillone | Syringaldehyde | Vanillylpropanol | Benzoic Acid | Syringic Acid | Total PhOH monomers (mmol/g total lignin) |
|-------|---------|----------|----------------|----------------|------------------|--------------|---------------|-------------------------------------------|
| C-Aas | 8.5     | 1.8      | 2.5            | 1.7            | 1.0              | 1.4          | 5.2           | 14.9                                      |
| L-Aas | 0       | 0.6      | 0.6            | 4.4            | 0                | 0.3          | 0.3           | 1.2                                       |
| C-Sas | 1.2     | 0        | 0.4            | 0.5            | 0                | 0.2          | 0.4           | 0.5                                       |
| L-Sas | 0       | 0.2      | 0.2            | 1.3            | 0                | 0.7          | 0             | Traces                                    |

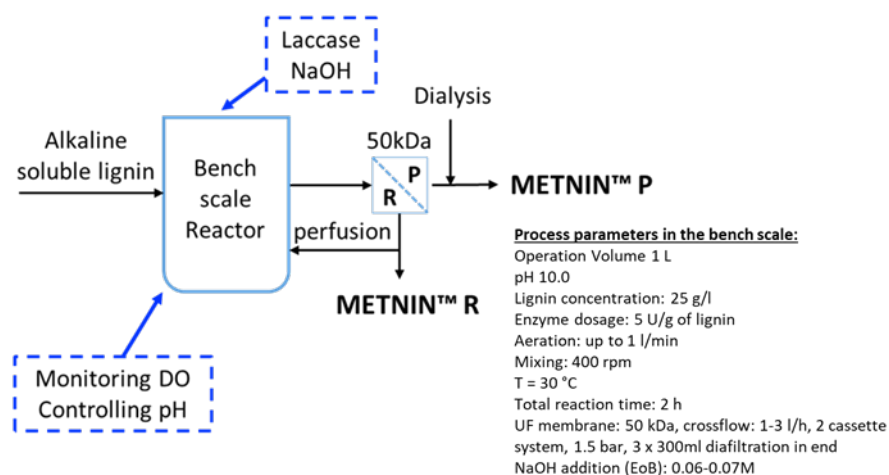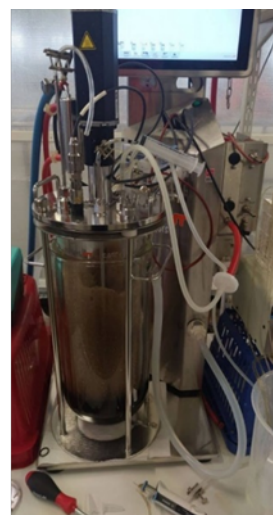

**Figure S1.** Scheme of the bench-scale set-up including the process parameters for the reaction with the alkaliphilic Li10 fungal laccase (left), and the bioreactor (7.5 l volume) coupled to a membrane separation system (right).

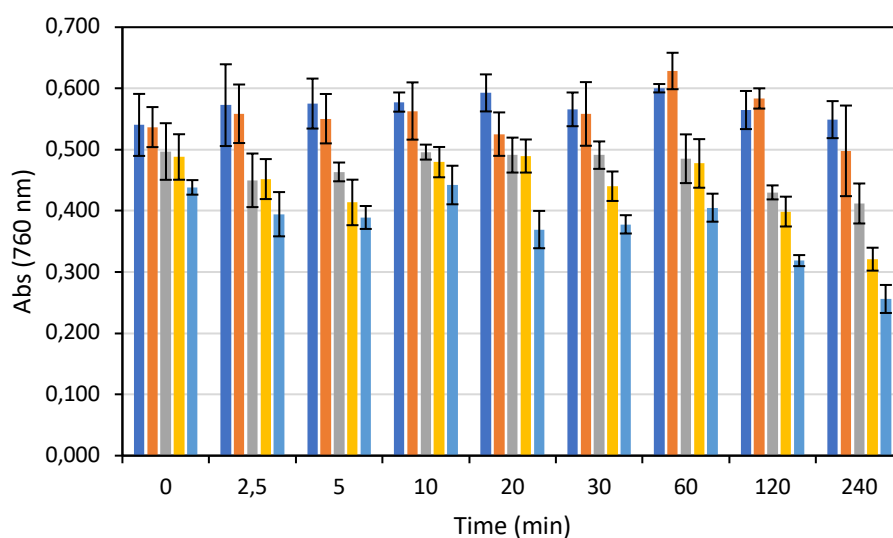

**Figure S2.** Changes in the phenolic OH content (measured by FCR) of Eucalyptus kraft lignin after treatment with different concentrations of C-LeB laccase for 2.5- 240 min. From left to right bars represent: control without enzyme (0), 6, 30, 60 and 180 mU/mg.
